# Supplementary material for: Spatially resolved multiomics on the neuronal effects induced by spaceflight in mice
Source: PubMed Central journal article supplement (PMC11166911; doi:10.1038/s41467-024-48916-8), 2024-06-11
Supplement: 41467_2024_48916_MOESM1_ESM.pdf [file 41467_2024_48916_MOESM1_ESM.pdf]

## Supplementary Information

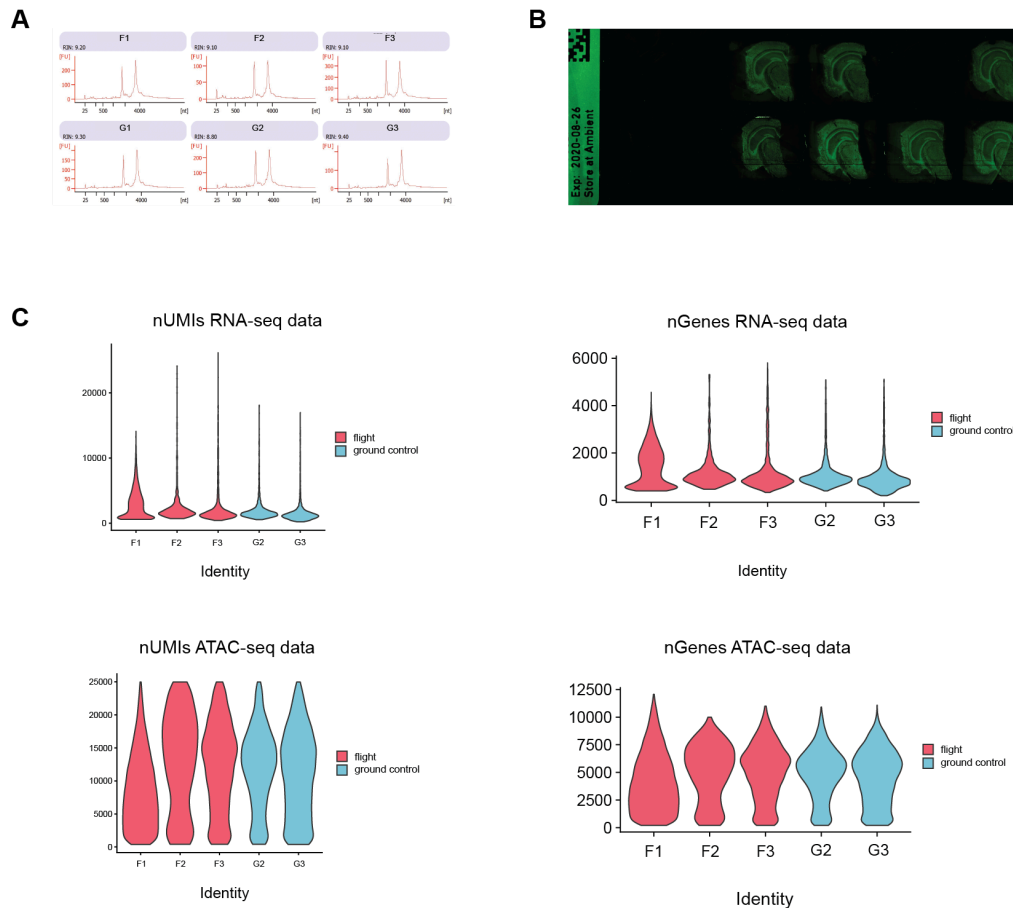

**Supplementary Figure 1:** **A**, Bioanalyzer traces showing RIN values for all brain samples. **B**, Fluorescent footprints of brain tissue section obtained from Visium Tissue Optimization protocol by 10x Genomics (for detailed protocol see: UserGuide\_RevB, CG000238), each section footprint represents different times tested during permeabilization step, empty position represents negative control, section untreated with permeabilization mix. **C**, Distributions of unique molecules and genes detected per nucleus per sample in single nuclei RNA-seq multiomics dataset (RNA-seq on top, and ATAC-seq on bottom) visualized as violin plots colored by sample condition (i.e., flight, and ground control).

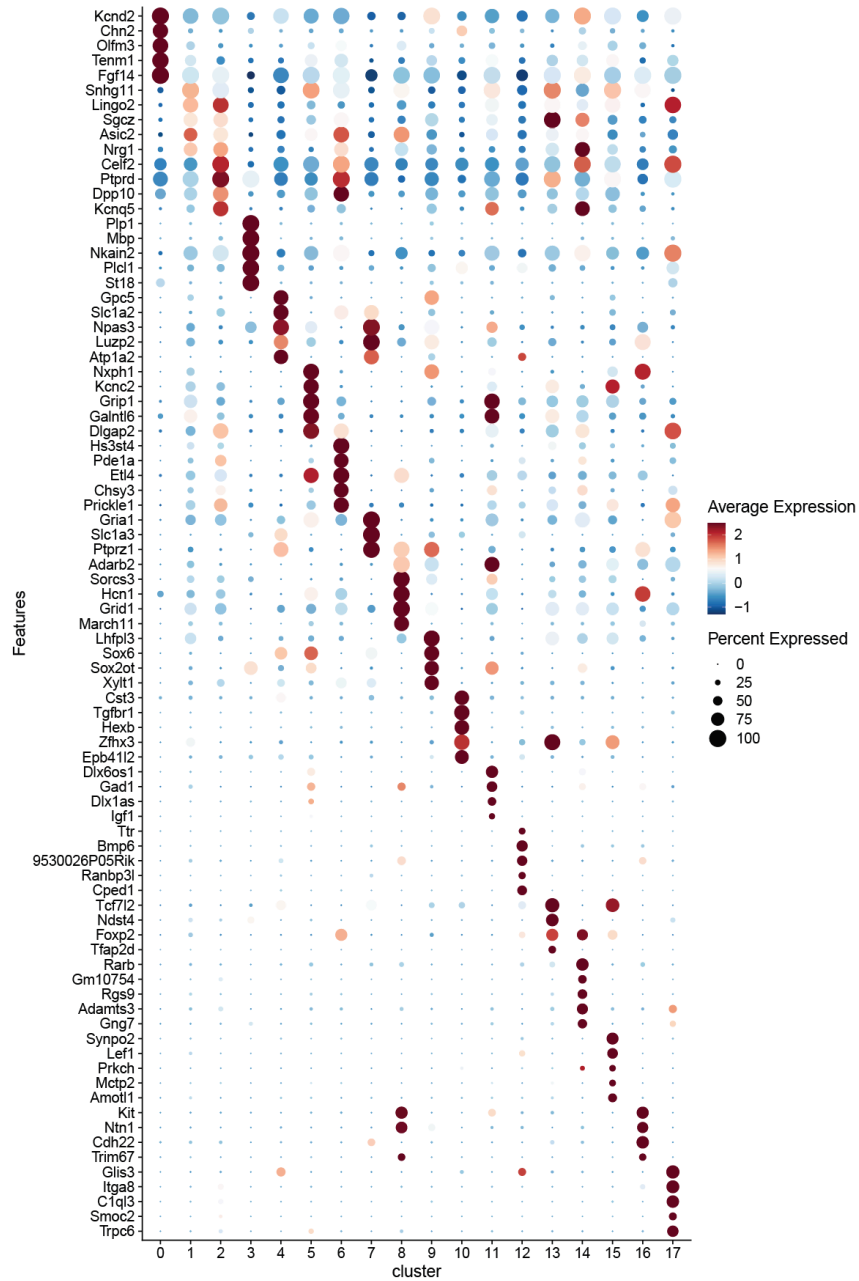

**Supplementary Figure 2:** Marker genes for each multiomics cluster visualized as Dot Plot.

These marker genes were used for annotation of the multiomics clusters based on key functions as well as cell types. Two-sided Wilcoxon's rank sum test was done to estimate for adjusted  $p$ -values (adjusted  $p$ -value < 0.05).

**A**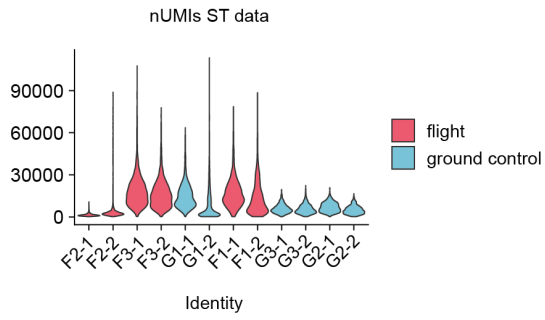**B**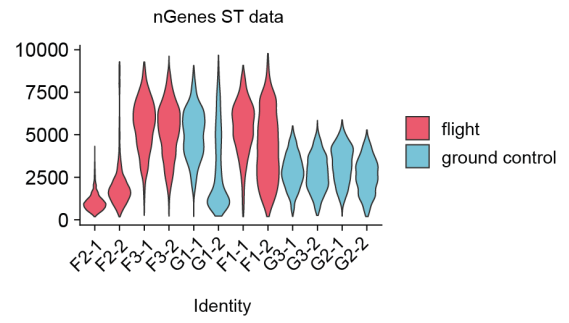

**Supplementary Figure 3: A,** Distributions of unique molecules (nUMIs) per spot per tissue section in ST dataset visualized as violin plots colored by sample condition (i.e., flight, and ground control). **B,** Distributions of genes (nGenes) per spot per tissue section in ST dataset visualized as violin plots colored by sample condition (i.e., flight, and ground control).

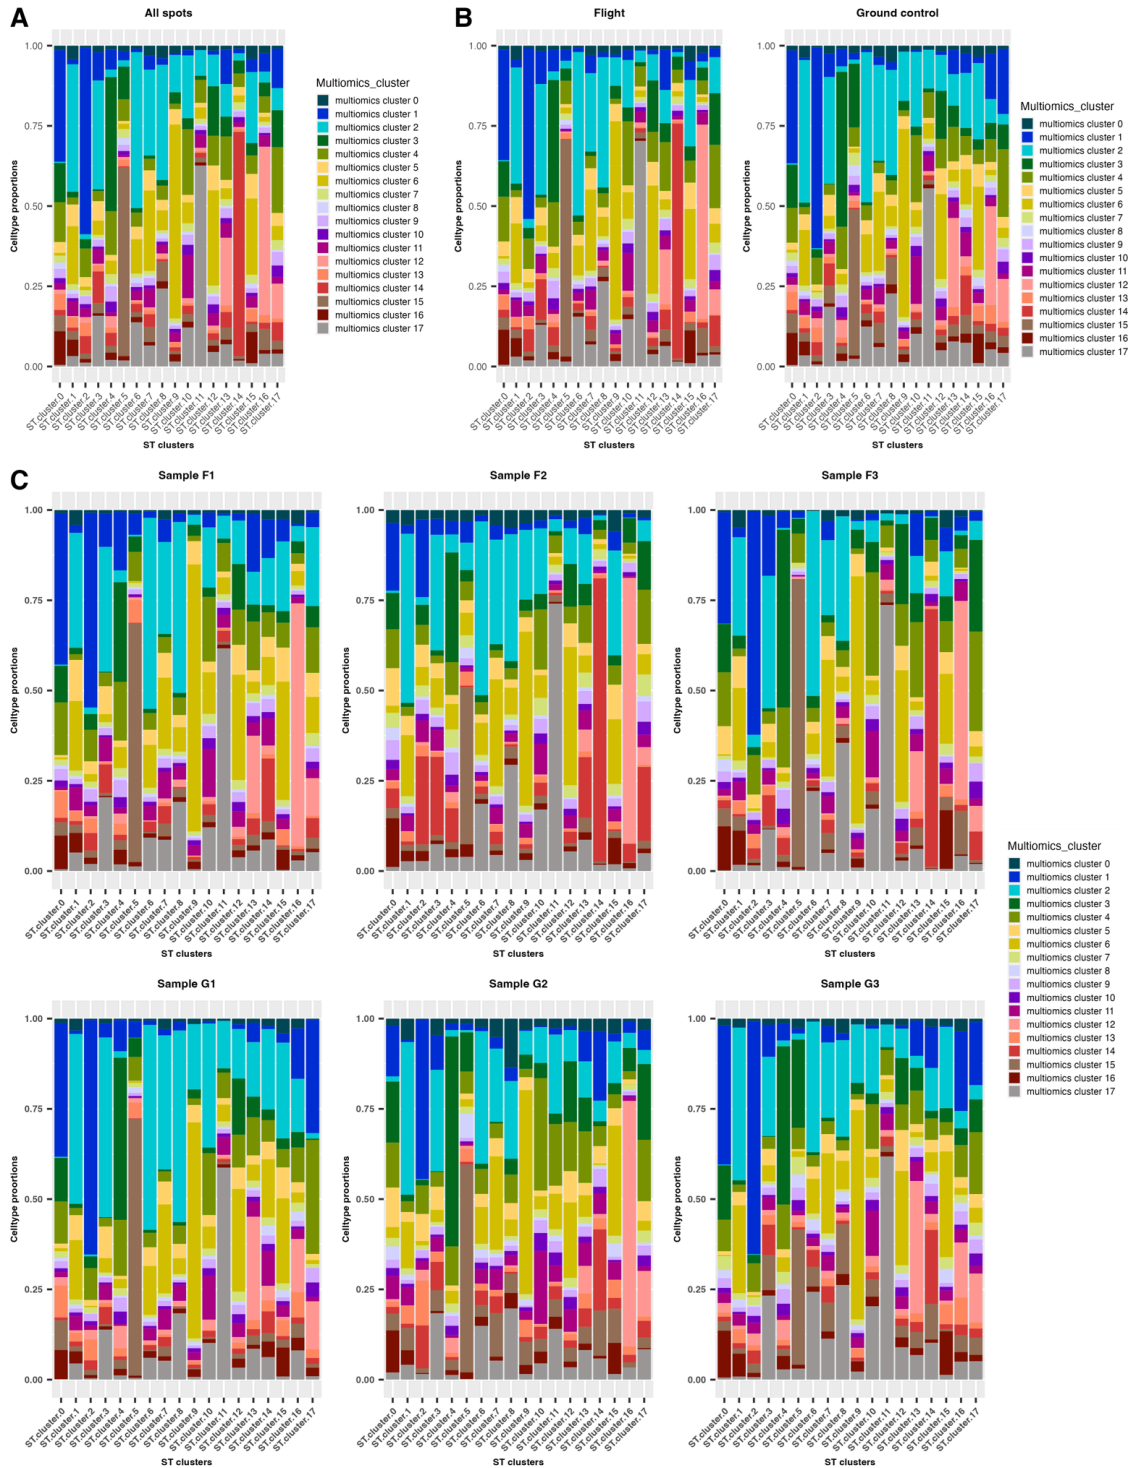

**Supplementary Figure 4: A,** Barplot showing all the proportions of multiomics clusters (multiomics cluster 0-17) in each ST cluster found from Stereoscope deconvolution. **B,** Barplot showing multiomics cluster proportions in each ST cluster separated by sample condition (Flight

samples on the left and Ground control on the right). **C**, Barplot showing multiomics cluster proportions in the ST clusters displayed separately for each individual sample. F1, F2, F3 - Flight; G1, G2, G3 - Ground control.

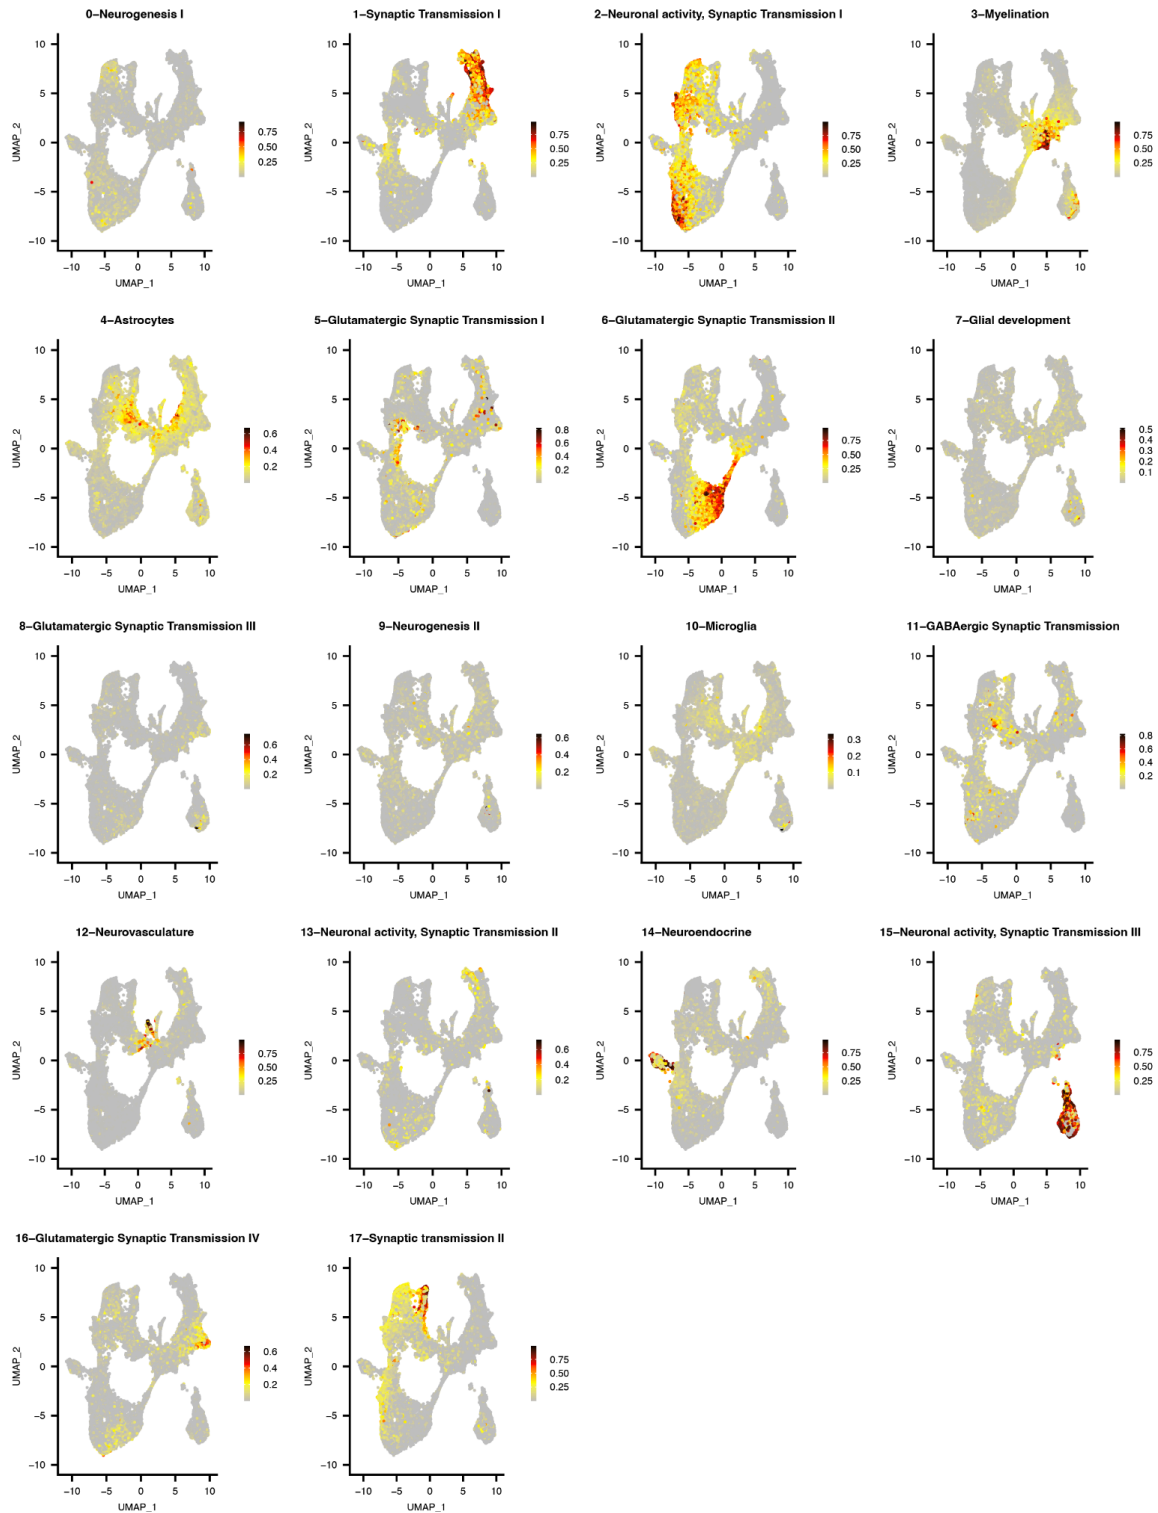

**Supplementary Figure 5:** Distribution of the multiomics clusters identified from Stereoscope deconvolution in the matching ST dataset, visualized as UMAP plot. The legend corresponds to

the proportion values of each multiomics cluster calculated by Stereoscope for each ST spot, ranging from 0 (no expression) to 1 (complete expression).

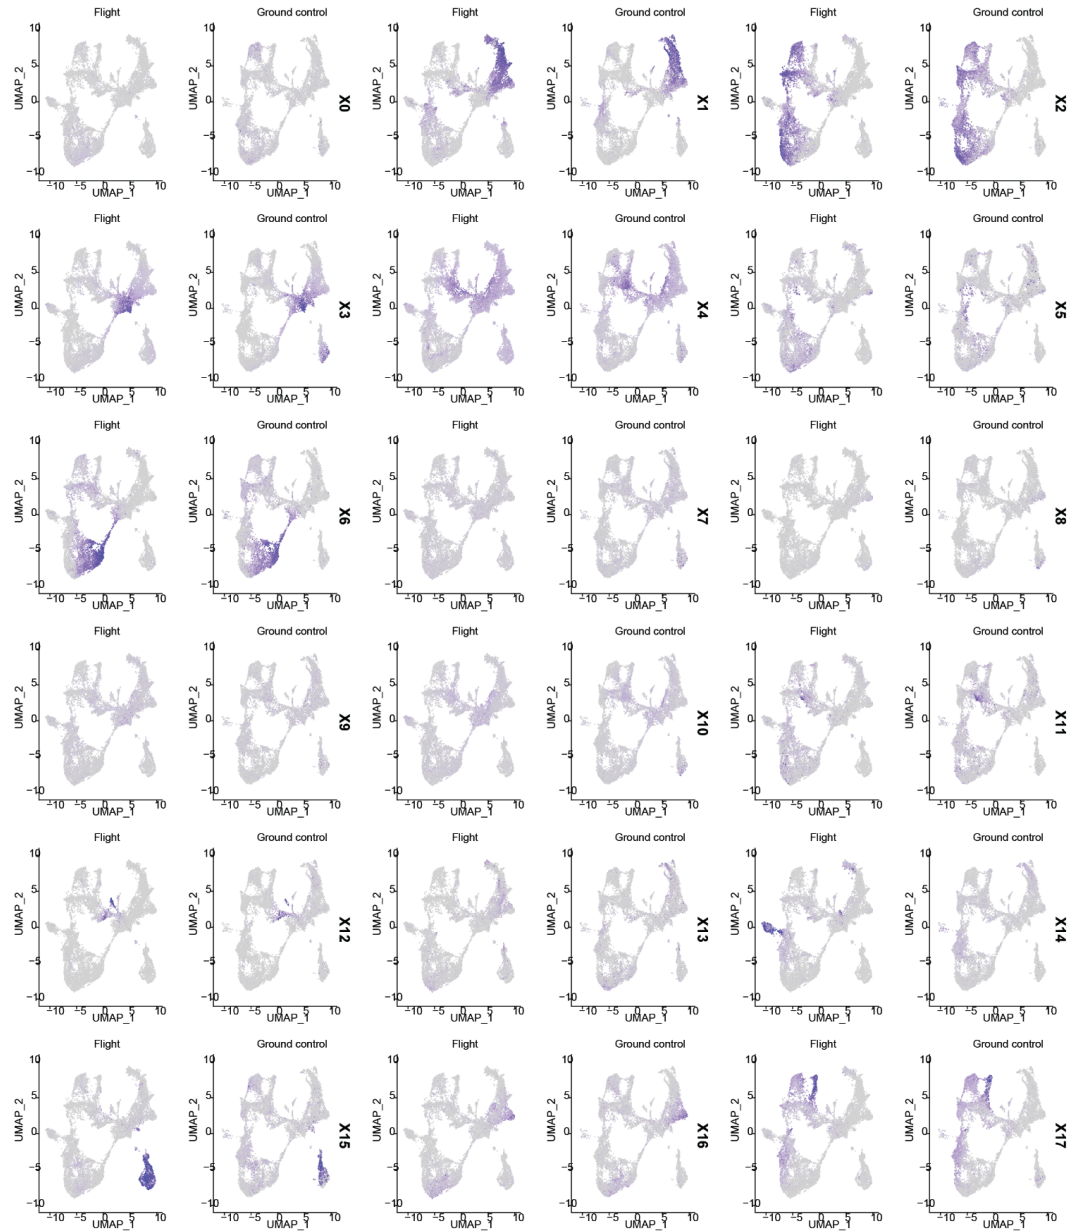

- |                                                         |                                                             |
|---------------------------------------------------------|-------------------------------------------------------------|
| <b>X0: 0-Neurogenesis I</b>                             | <b>X9: 9-Neurogenesis II</b>                                |
| <b>X1: 1-Synaptic Transmission I</b>                    | <b>X10: 10-Microglia</b>                                    |
| <b>X2: 2-Neuronal activity, Synaptic Transmission I</b> | <b>X11: 11-GABAergic Synaptic Transmission</b>              |
| <b>X3: 3-Myelination</b>                                | <b>X12: 12-Neurovasculature</b>                             |
| <b>X4: 4-Astrocytes</b>                                 | <b>X13: 13-Neuronal activity, Synaptic Transmission II</b>  |
| <b>X5: 5-Glutamatergic Synaptic Transmission I</b>      | <b>X14: 14-Neuroendocrine</b>                               |
| <b>X6: 6-Glutamatergic Synaptic Transmission II</b>     | <b>X15: 15-Neuronal activity, Synaptic Transmission III</b> |
| <b>X7: 7-Glial development</b>                          | <b>X16: 16-Glutamatergic Synaptic Transmission IV</b>       |
| <b>X8: 8-Glutamatergic Synaptic Transmission II</b>     | <b>X17: 17-Synaptic Transmission II</b>                     |

**Supplementary Figure 6:** Distribution of the multiomics clusters (X0-X17) identified from Stereoscope deconvolution in the matching ST dataset, visualized as a UMAP plot in split-view



format separating the flight and ground control samples. Cluster annotations for the multiomics clusters (X0-X17) are also stated at the bottom of the figure.

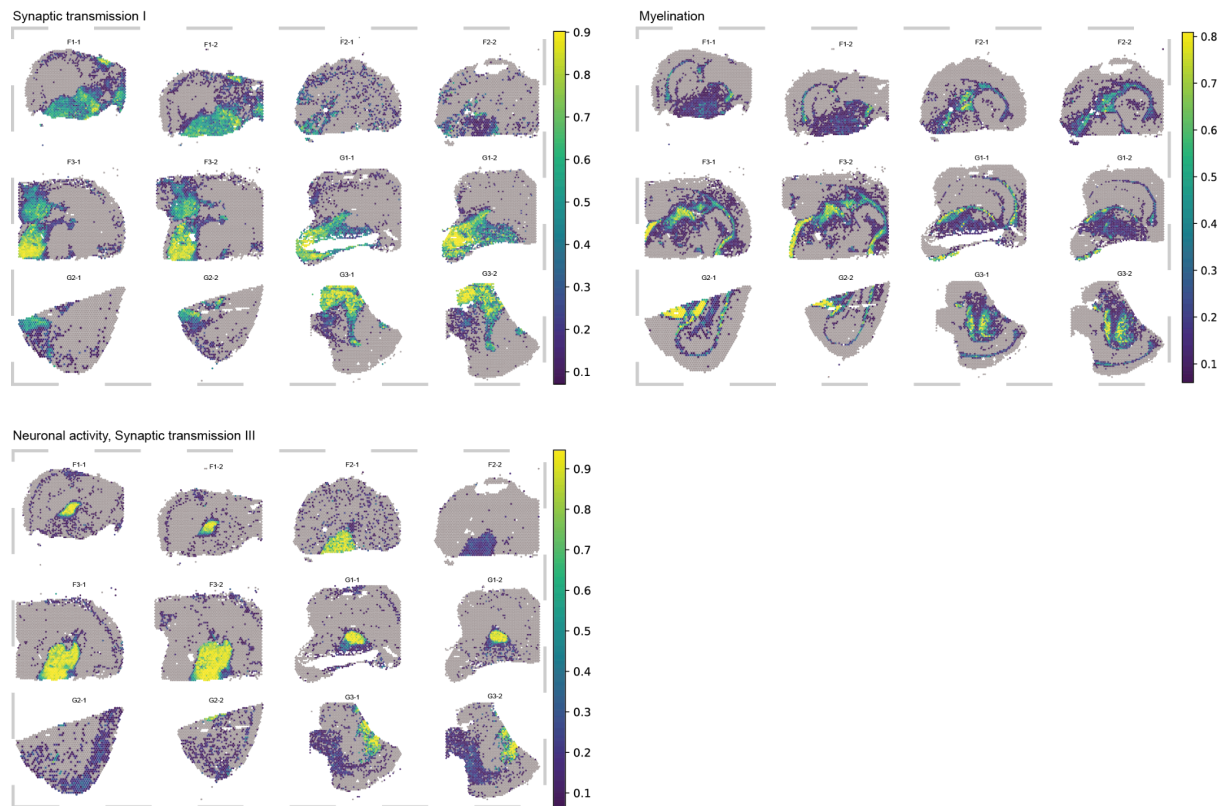

**Supplementary Figure 7:** Spatial localization of multiomics clusters 1, 3 and 15 (Synaptic Transmission I, Myelination and Neuronal activity, Synaptic Transmission III) visualized on all ST brain sections.

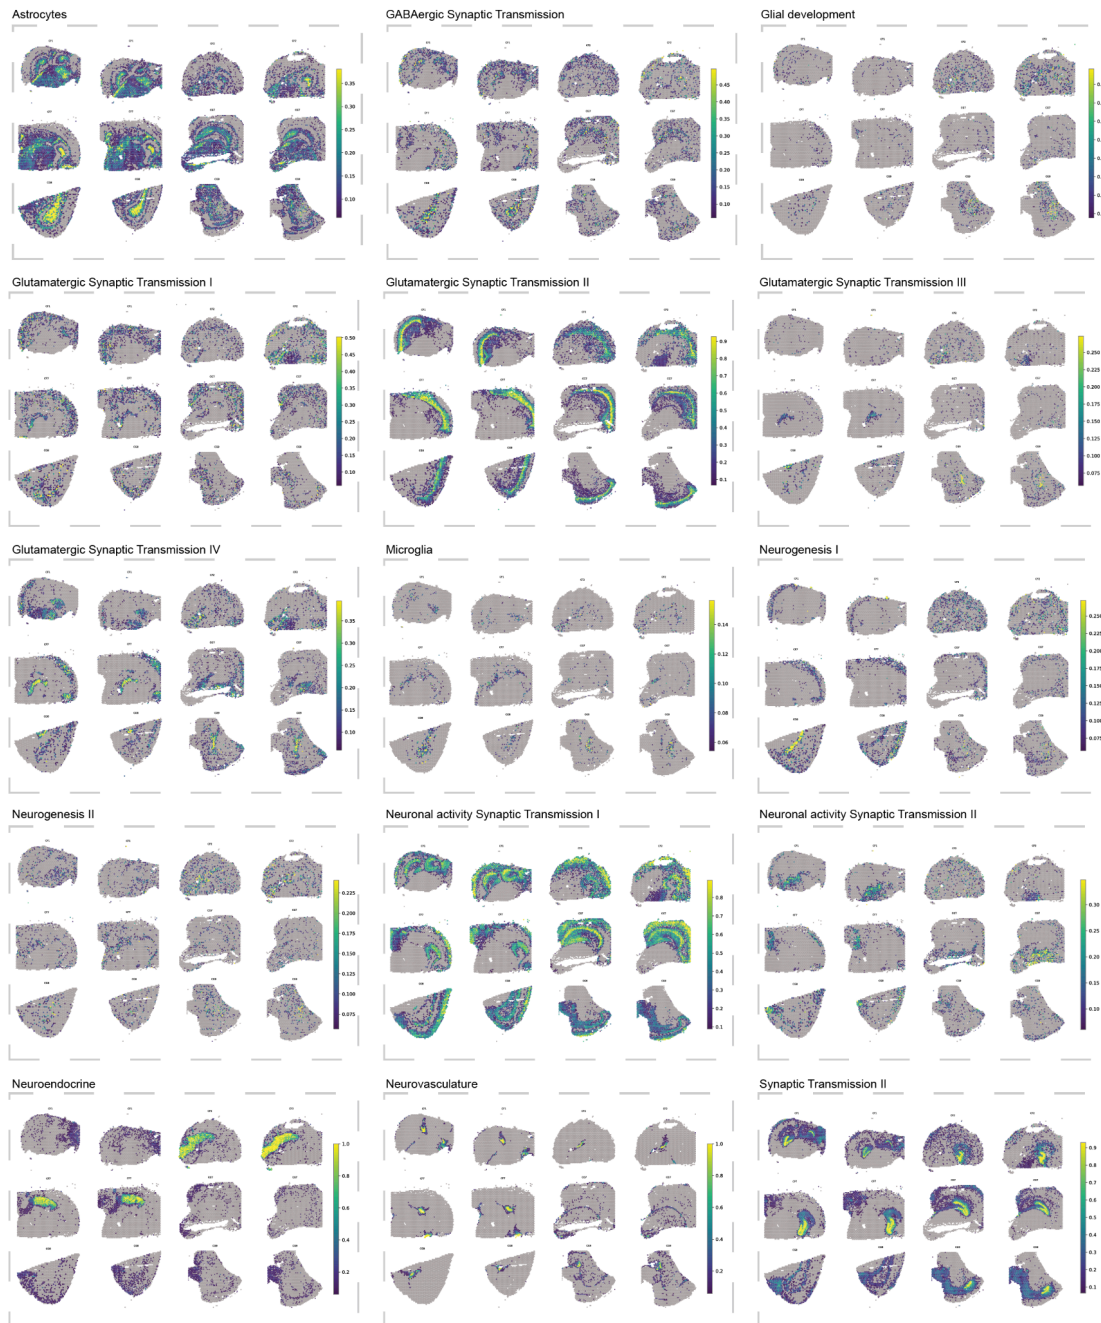

**Supplementary Figure 8:** Spatial localization of the remaining multiomics clusters visualized on all ST brain sections.

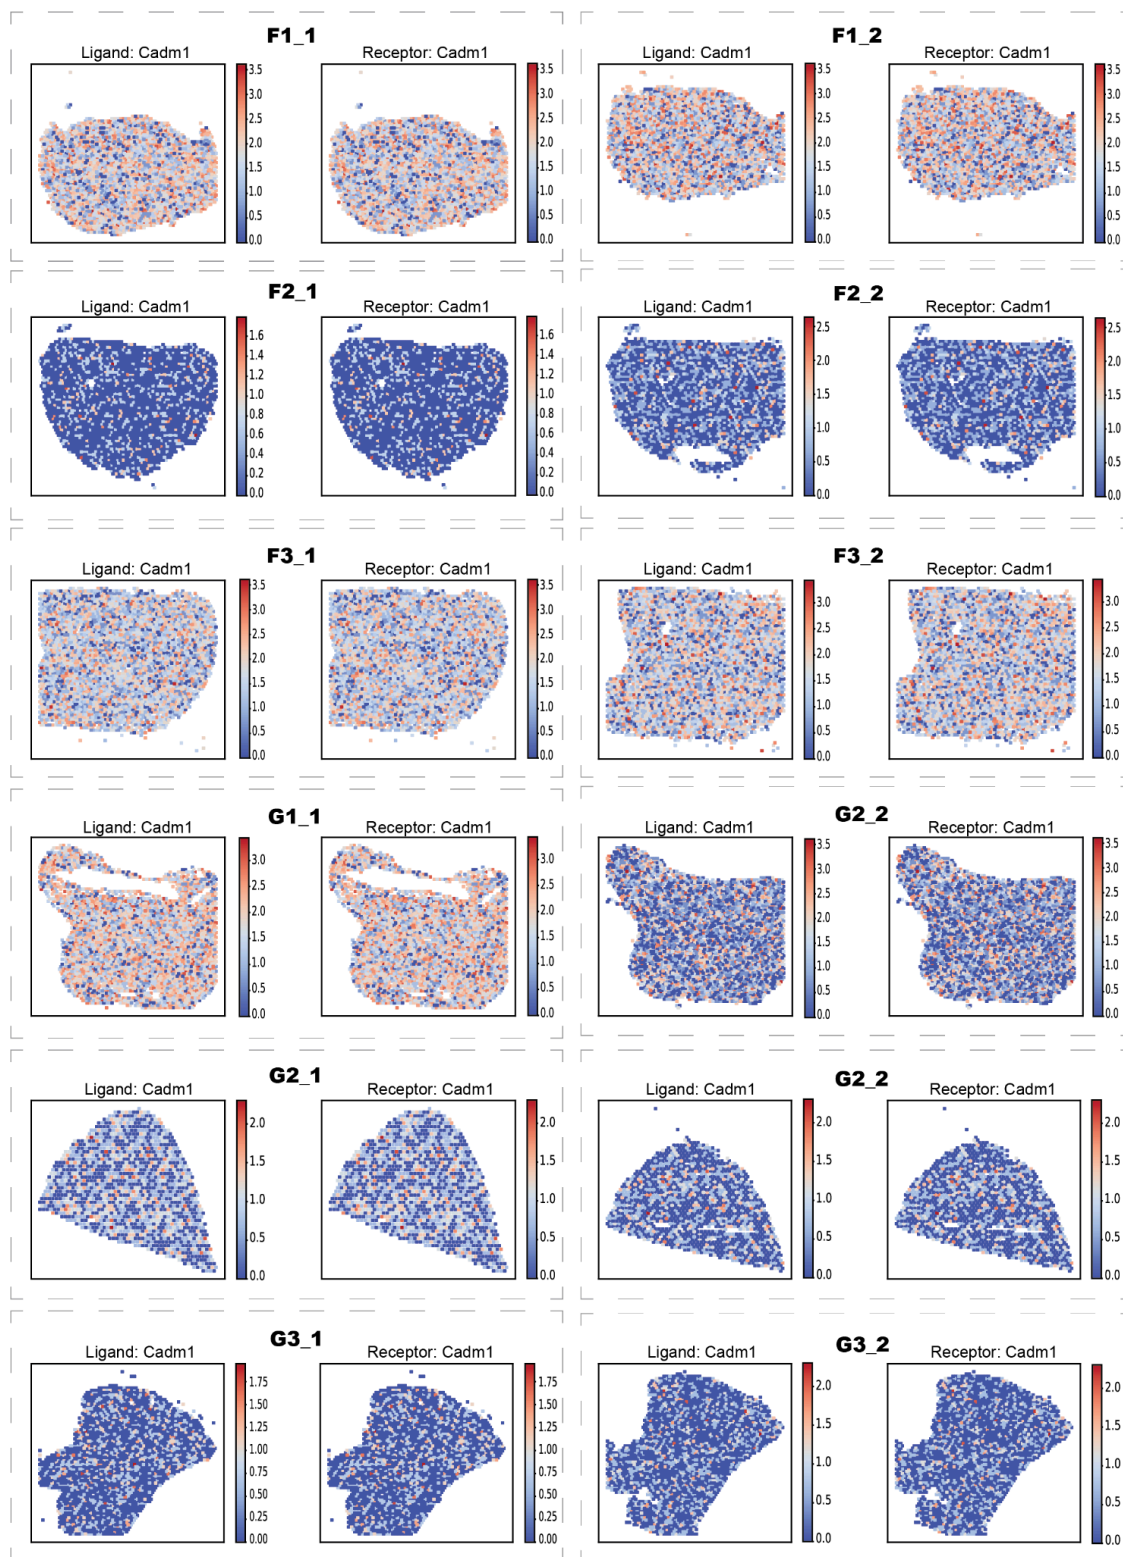

**Supplementary Figure 9:** Local spots selected by SpatialDM for ligand-receptor pair CADM1-CADM1 across all 12 ST brain sections, shown as an example heatmap.



**Supplementary Figure 10:** Heatmap showing relative fold change differences (log<sub>2</sub>FC values) between flight and ground control samples in glycolysis and gluconeogenesis pathways in both ST and multiomics datasets. st\_brain\_cluster: ST Cluster, sn\_brain\_cluster: multiomics cluster.



**Supplementary Figure 11:** Heatmap showing relative fold change differences (log<sub>2</sub>FC values) between flight and ground control samples in fructose and mannose metabolism pathway in both ST and multiomics datasets. st\_brain\_cluster: ST Cluster, sn\_brain\_cluster: multiomics cluster.



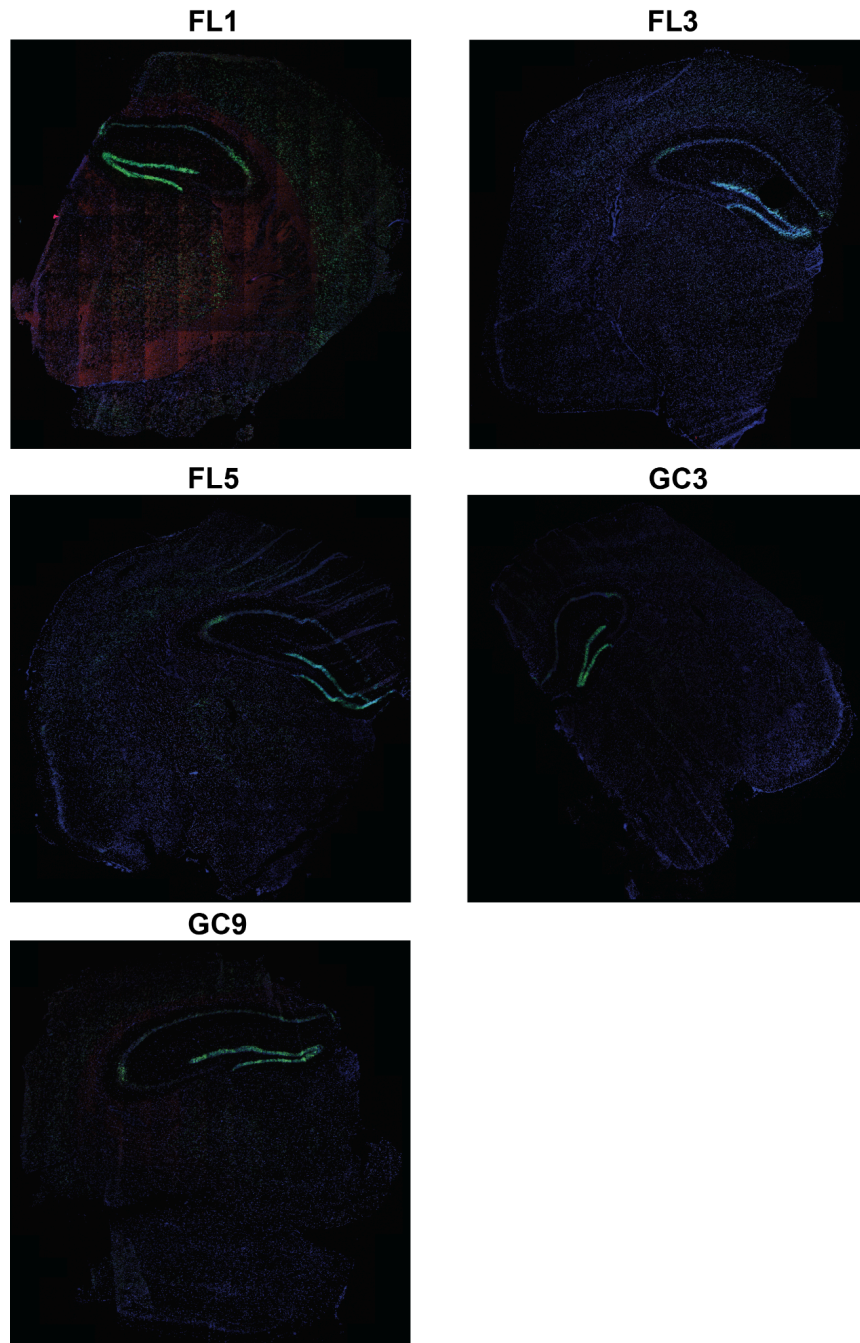

**Supplementary Figure 12:** RNAscope fluorescence images of the whole brain sections for the five brain samples used in the validation experiments. FL1, FL3, FL5 refer to the spaceflight samples and GC3, GC9 refer to the ground control samples. Nuclei are visualized via three fluorescence channels: blue for DAPI, green (code 488) for gene of interest *Adcy1*, and red (code 555) for gene of interest *Gcp5*.

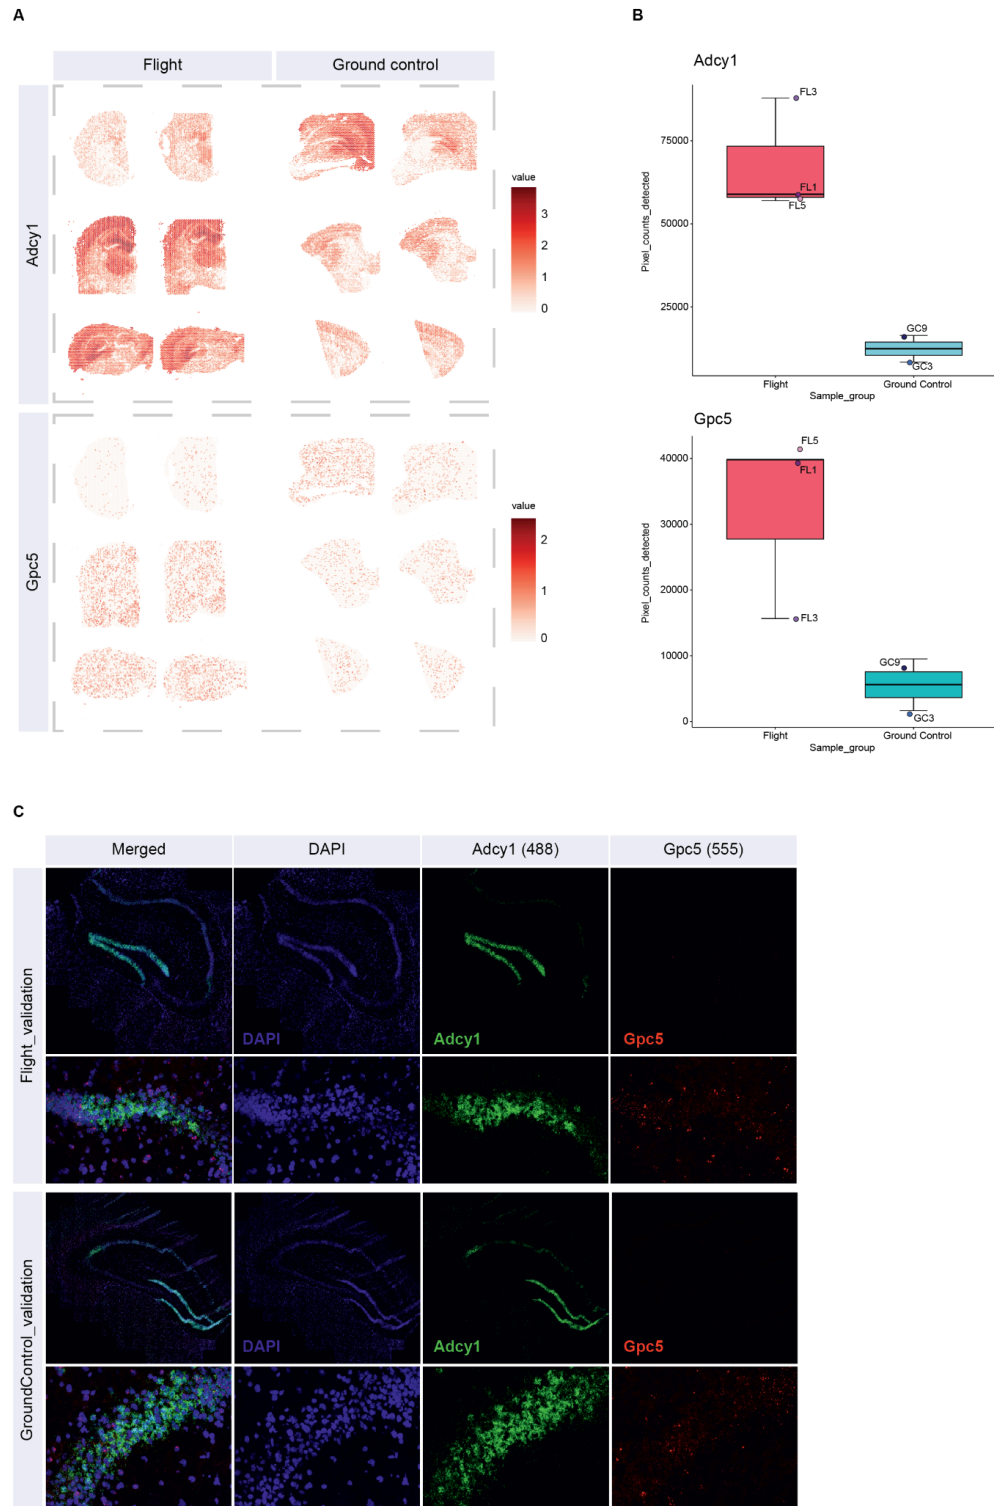

**Supplementary Figure 13: A**, Spatial distribution of genes *Adcy1* and *Gpc5* across flight mouse brain samples (F1-F3) and ground control mouse brain samples (G1-G3) in the ST dataset. **B**,

Boxplots showing quantification of the signal for *Adcy1* and *Gpc5* genes detected across whole hemispheres of three flight samples and two ground control samples using the RNAscope method. The quantification was done by counting the pixels detected for each gene. FL1, FL3, FL5 - Flight; GC3, GC9 - Ground control. **C**, RNAscope fluorescence image of one flight and one ground control mouse brain samples in hippocampal region visualizing nuclei (blue, DAPI) and genes *Adcy1* (green, 488) and *Gcp5* (red, 555). Each row immediately below these images, for each group, represents the close-up view of the same hippocampal region at 40X resolution. *Adcy1* (green, 488) was found to be upregulated in the hippocampal CA3 (ST cluster 8) and dentate gyrus regions (ST cluster 11) of the spaceflight samples.
